# Supplementary material for: Loss of PLK2 induces acquired resistance to temozolomide in GBM via activation of notch signaling
Source: J Exp Clin Cancer Res. 2020 Nov 11;39:239. doi: 10.1186/s13046-020-01750-4 (PMC7657349; doi:10.1186/s13046-020-01750-4)
Supplement: Supplementary file 8 — Additional file 8: Supplementary Table 3. The differentially expressed kinases in TCGA GBM. [file 13046_2020_1750_MOESM8_ESM.xlsx]

## Sheet: TCGAplk2gbmvsct
Table S3 TCGA
Gene Symbols	GBM/Non-tumor
PGK2	8.45476
MELK	6.80212
AURKB	6.63236
BUB1	5.29093
TTK	5.04628
BUB1B	5.02457
GSG2	4.34338
EGFR	4.20169
WEE1	4.1978
CDK2	3.62719
AMHR2	3.55976
NEK2	3.48978
GUCY2F	3.38171
CDK4	3.19506
TK1	3.19138
PLK1	3.18754
MRC2	2.80972
TXK	2.6672
CHEK2	2.65861
DBF4	2.56549
PTK7	2.55221
CHEK1	2.48314
CDKN3	2.45441
STK17B	2.44601
PKMYT1	2.41255
DTYMK	2.39703
EPHB4	2.3759
TRIB3	2.33132
STK17A	2.30328
STK33	2.14951
PRKACG	2.12346
NME4	2.09004
CDK6	2.03976
AK2	2.03247
PLK4	1.96653
ALPK2	1.96322
GALK1	1.87332
PHKG1	1.81076
STK38	1.81001
FLT4	1.79498
PRKD1	1.78532
GK2	1.76708
HK3	1.76187
PRKD3	1.76054
LCK	1.73078
BTK	1.72735
LYN	1.69022
STK32A	1.68569
HK2	1.67228
PRKD2	1.65427
NEK6	1.62899
MAP3K1	1.61791
MAPKAPK3	1.60798
RIPK3	1.60658
IKBKE	1.60404
STK36	1.58005
BMX	1.57384
CKM	1.56832
EPHA2	1.5509
DYRK3	1.54981
TRIB2	1.54039
IRAK4	1.53625
PI4K2B	1.52952
DDR2	1.5231
DDR1	1.50439
HCK	1.49432
TGFBR1	1.49187
HKDC1	1.48175
MAPK7	1.44707
SYK	1.44078
MAPKAPK2	1.43993
MAK	1.4216
EPHA1	1.42069
STK10	1.40015
IKBKB	1.39508
YES1	1.37071
PFKFB4	1.36626
RYK	1.36058
NME1	1.35079
ERBB2	1.33317
PKN3	1.31232
NTRK1	1.31089
RIPK1	1.29562
ROR1	1.29479
PRKX	1.26983
IRAK3	1.25866
LATS2	1.25042
ACVRL1	1.21975
KDR	1.21524
ZAP70	1.20852
IRAK1	1.20723
INSRR	1.19616
FGR	1.18994
MAP3K6	1.16537
PIK3CG	1.16097
TGFBR2	1.1479
MAP3K8	1.13939
GK	1.13254
PDGFRB	1.12576
STK32B	1.12504
NPR1	1.10752
MAP3K14	1.09753
PSKH1	1.08718
ADPGK	1.08631
MAP4K1	1.08107
ALPK1	1.07857
PCK2	1.06495
FES	1.01282
STK3	1.00102
NME7	0.99871
PHKA1	0.987263
ETNK2	0.98181
ITPKC	0.97198
TEC	0.965746
PKN2	0.954731
RIPK2	0.943971
DGUOK	0.93937
ALPK3	0.93524
CSNK1A1L	0.925571
PLK3	0.91454
ADCK4	0.902176
STK38L	0.900285
DYRK4	0.899984
TRIM28	0.884604
PDK1	0.877661
BLK	0.862418
NEK11	0.85409
MYLK2	0.849621
RPS6KA1	0.848476
PKN1	0.839701
TP53RK	0.836676
NEK8	0.833763
NME6	0.823766
PIM1	0.814526
ROCK1	0.790532
UCKL1	0.788435
PDGFRA	0.782797
BMPR1A	0.780773
MAP2K3	0.778157
RAF1	0.7774
CDC7	0.772745
STK16	0.760737
AKT2	0.759487
PGK1	0.753257
PAK2	0.752788
EPHB3	0.745803
RPS6KB2	0.745135
MKNK2	0.735508
PRKAR2A	0.732142
UNK	0.73167
AKT1	0.724634
SPHK1	0.714088
CLK2	0.705168
GRK7	0.701942
CSK	0.696761
PFKFB1	0.694859
MERTK	0.688467
TYK2	0.685307
FGFR4	0.665785
RIOK2	0.661338
EPHB2	0.658115
ITK	0.648984
BMP2K	0.645365
PIP5K1A	0.636344
NAGK	0.62178
VRK3	0.617272
NME2	0.615192
DMPK	0.604735
FYN	0.604407
AURKC	0.591501
OXSR1	0.588494
ERN1	0.572538
ILK	0.56712
DCAKD	0.563698
ADK	0.559807
RIOK1	0.545011
FASTK	0.541042
PAK4	0.536281
CDK7	0.532587
CDKL3	0.526493
FGFR1	0.521514
PRKCH	0.518364
CSNK1A1	0.512514
VRK1	0.511444
GUCY2C	0.451893
EIF2AK3	0.449063
EEF2K	0.448447
ABL1	0.440105
EPHA3	0.435208
PRKAA1	0.428992
PHKB	0.420252
NEK4	0.414645
RNASEL	0.403066
MAP2K6	0.396498
RIOK3	0.38791
TRPM7	0.376288
AXL	0.361895
MAP3K13	0.359948
CASK	0.352708
PDK3	0.352642
CDK3	0.347174
FUK	0.331674
AK3	0.321078
PRKRA	0.320748
PRPS1	0.319188
NME3	0.31901
LIMK2	0.300192
FER	0.299597
NEK9	0.298953
UCK1	0.298665
CLK3	0.297468
BCKDK	0.296863
MAPK14	0.29501
STK4	0.276209
MASTL	0.274117
ACVR1	0.271692
ROR2	0.267949
TPK1	0.264556
TIE1	0.260946
EIF2AK4	0.254159
PHKA2	0.239332
CSNK2A1	0.235318
CSNK1G3	0.227906
STK11	0.219918
ADCK2	0.219121
TRIB1	0.20796
MKNK1	0.191682
NEK1	0.190162
PRPF4B	0.181916
TRIO	0.177651
MAPKAPK5	0.161831
NPR2	0.160281
XYLB	0.152191
JAK1	0.145535
GCK	0.144768
CDK8	0.141038
NEK7	0.140767
MAP3K7	0.135737
PIK3CA	0.134763
DYRK2	0.131429
CLK1	0.129952
TRRAP	0.116961
CSNK1G1	0.116056
STK19	0.112965
BRD2	0.103843
PRKDC	0.0955166
CSNK2A2	0.0916329
SRPK1	0.0723264
GALK2	0.0698639
GRK1	0.068435
RPS6KB1	0.0665736
TAF1	0.0662488
TAOK3	0.0601727
VRK2	0.0590856
RPS6KA3	0.0565586
MAP2K2	0.054117
DCK	0.0540153
PRPS2	0.046053
TLK2	0.0385547
MAP3K2	0.036182
CSNK1E	0.0345937
DGKD	0.020765
HIPK1	0.0147628
PHKG2	0.0140793
PAPSS1	0.0102463
MAPK4	0.00756062
CSNK1D	-0.0203795
MAP4K3	-0.0236974
DAK	-0.0427644
ATM	-0.0455068
LATS1	-0.0515292
MARK3	-0.0557174
UCK2	-0.0638582
TEX14	-0.0660846
MAP4K4	-0.0788144
TLK1	-0.0797182
TK2	-0.0859704
SRC	-0.0895095
PFKL	-0.09698
NEK3	-0.0991814
MAP3K3	-0.103002
MAPK12	-0.103599
RBKS	-0.106533
CDK10	-0.11172
PFKFB3	-0.121933
CDK9	-0.126063
CHKB	-0.131397
LRRK2	-0.134098
GRK4	-0.139461
MAP2K5	-0.145268
HIPK3	-0.153396
PIK3CD	-0.157167
PDIK1L	-0.159534
ATR	-0.164953
DAPK3	-0.178648
MAST2	-0.184641
MAP3K11	-0.194106
CSNK1G2	-0.195781
GUK1	-0.197512
PASK	-0.205421
IRAK2	-0.206972
BRD4	-0.212771
CAMK2D	-0.219572
DGKA	-0.222163
BRD3	-0.234067
PMVK	-0.234334
CERK	-0.237069
TBK1	-0.247001
CLK4	-0.276525
MAP2K7	-0.282336
CHUK	-0.284557
GRK6	-0.297269
JAK2	-0.310885
FLT1	-0.311802
PIM3	-0.315494
LIMK1	-0.319415
GUCY2D	-0.331006
PIK3R4	-0.332292
HSPB8	-0.342579
JAK3	-0.344307
PIK3C3	-0.380529
PANK2	-0.387602
SPHK2	-0.392832
ITPKB	-0.394875
ETNK1	-0.402747
AK1	-0.40316
PRKCI	-0.40556
SNRK	-0.406186
TNIK	-0.408561
INSR	-0.421652
IPMK	-0.422943
CHKA	-0.429906
TESK1	-0.434117
PRKACA	-0.435538
MYO3B	-0.438213
PANK4	-0.438924
MAP3K12	-0.454196
EPHB1	-0.460311
ICK	-0.46433
SCYL1	-0.470401
RFK	-0.471178
MAP4K5	-0.473132
NME5	-0.482594
STK24	-0.48744
TRIM33	-0.496551
FN3KRP	-0.498741
STK35	-0.50168
SRMS	-0.503602
ADCK5	-0.507836
STK25	-0.516448
CALM2	-0.526921
CDK5	-0.52976
UGP2	-0.539607
MYLK	-0.54996
ABL2	-0.554524
MAPK6	-0.578821
TAOK1	-0.579254
GNE	-0.587606
RPS6KC1	-0.601088
PDK4	-0.60754
PANK3	-0.620883
LTK	-0.629056
DYRK1A	-0.629824
DYRK1B	-0.63624
GSK3B	-0.636815
ADCK1	-0.646787
PIM2	-0.648071
GAK	-0.668602
MAP3K4	-0.674457
PFKFB2	-0.679121
ANKK1	-0.681322
IGF1R	-0.686931
ALK	-0.704675
CAMK1	-0.709709
MVK	-0.711042
PFKM	-0.712189
MST1R	-0.739942
KSR1	-0.761741
MAP3K5	-0.778539
STK39	-0.798428
ROCK2	-0.800856
KHK	-0.803297
GRK5	-0.827226
MARK2	-0.831613
DAPK1	-0.836294
GSK3A	-0.851006
SMG1	-0.851804
PIP5KL1	-0.855952
MARK1	-0.860578
MARK4	-0.862282
TAF1L	-0.863327
PTK2	-0.864684
ACVR2B	-0.867073
CDKL4	-0.868368
MAST4	-0.904191
CKMT2	-0.922286
UHMK1	-0.927121
PRKG1	-0.950924
HIPK2	-0.954323
BCR	-0.956876
HUNK	-0.958641
TAOK2	-0.961151
PRKCA	-0.973957
SIK2	-0.981
COL4A3BP	-0.98697
SRPK2	-1.03557
DGKK	-1.03913
DAPK2	-1.04181
ADRBK1	-1.04459
PTK6	-1.05045
TNK1	-1.05295
BMPR2	-1.06008
TTN	-1.06076
TESK2	-1.07153
MAPK13	-1.11869
MAP4K2	-1.11955
CDKL1	-1.1212
PDK2	-1.13584
CKB	-1.14342
PANK1	-1.16879
PDPK1	-1.17009
NTRK2	-1.17949
RPS6KA4	-1.18742
BRAF	-1.19102
PIK3CB	-1.21133
NTRK3	-1.21608
LRRK1	-1.21818
MAPK1	-1.2288
ACVR1B	-1.23983
MAPK3	-1.24617
PRKCD	-1.24732
ULK1	-1.25796
CDC42BPA	-1.27884
PDXK	-1.28439
DGKG	-1.29232
MAPK8	-1.30837
PXK	-1.31836
AKT3	-1.35317
RET	-1.35349
ULK2	-1.36972
PCK1	-1.381
SLK	-1.40404
EPHA4	-1.40748
TEK	-1.4105
MAPK11	-1.4122
DGKQ	-1.43115
PINK1	-1.46189
DGKH	-1.51372
CDC42BPB	-1.51716
PIP5K1C	-1.51861
PRKAA2	-1.5891
RPS6KA2	-1.63522
FRK	-1.65035
FGFR2	-1.70033
ITPK1	-1.7025
MAP2K1	-1.72171
NLK	-1.73149
HK1	-1.74426
PSKH2	-1.77637
PFKP	-1.79078
FN3K	-1.81361
KIT	-1.82926
MAP2K4	-1.83793
PRKACB	-1.84757
RIPK4	-1.90521
MET	-1.9065
CALM1	-1.91882
MAPK10	-1.9241
RPS6KA5	-1.92418
STK31	-1.94545
FGFR3	-1.961
OBSCN	-1.98697
MAPK9	-1.99869
TTBK2	-2.00477
CIT	-2.02103
ERBB3	-2.03426
SGK2	-2.03705
MUSK	-2.03725
TYRO3	-2.0452
TTBK1	-2.08705
ADRBK2	-2.11709
DGKI	-2.13812
TNNI3K	-2.14943
PTK2B	-2.1518
DGKZ	-2.15383
RPS6KL1	-2.15862
PLK2	-2.16383
AK7	-2.18773
CALM3	-2.19333
CAMK2G	-2.19393
MADD	-2.21578
BRDT	-2.27584
CAMKK2	-2.28987
PRKCQ	-2.32573
PIP5K1B	-2.33185
LMTK2	-2.33321
AAK1	-2.34787
FLT3	-2.41409
MAP3K10	-2.45685
NRK	-2.49048
LMTK3	-2.5494
STK32C	-2.59755
ERBB4	-2.61737
CAMK2N1	-2.66336
DGKB	-2.7755
TRPM6	-2.86534
MAST1	-2.87708
PAK1	-2.88928
EPHA5	-2.92226
ITPKA	-2.93209
CAMK1D	-3.06711
RPS6KA6	-3.07707
EPHA7	-3.11273
CDK5R1	-3.24607
PRKCE	-3.32379
MYO3A	-3.44847
PKLR	-3.46891
CAMK2B	-3.66099
MAST3	-3.79865
DGKE	-3.82399
ROS1	-3.88335
PNCK	-3.91674
CAMK4	-3.9449
PRKCZ	-3.94593
AATK	-3.94735
CDKL5	-3.96418
CAMKK1	-3.96775
MAP3K9	-4.00386
MATK	-4.1304
PAK3	-4.16496
EPHB6	-4.22475
PAK6	-4.29398
CDKL2	-4.45569
PRKG2	-4.46145
PAK7	-4.54342
ACVR1C	-4.75001
EPHA10	-4.82891
CAMK1G	-4.99655
EPHA8	-5.171
KSR2	-5.38517
AK5	-5.58016
CAMK2A	-5.9355
HIPK4	-5.95937
STYK1	-6.32484
EPHA6	-6.33644
PACSIN1	-6.51377
PRKCG	-6.87592
MOS	-8.88413
